# Supplementary material for: Development of a self-management intervention for stroke survivors with aphasia using co-production and behaviour change theory: An outline of methods and processes
Source: PubMed Central journal article supplement (PMC8610248; doi:10.1371/journal.pone.0259103), 2021-11-23

**Who might be involved in supporting self-management?**

**Speech and language therapists**

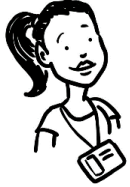

|      |   |      |   |
|------|---|------|---|
| Pros | ✓ | Cons | ✗ |
|------|---|------|---|

**Charity support workers**

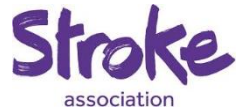

|      |   |      |   |
|------|---|------|---|
| Pros | ✓ | Cons | ✗ |
|------|---|------|---|

**Family and Friends**

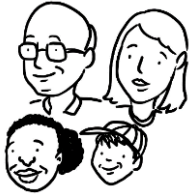

|      |   |      |   |
|------|---|------|---|
| Pros | ✓ | Cons | ✗ |
|------|---|------|---|

**Other:** \_\_\_\_\_

|      |   |      |   |
|------|---|------|---|
| Pros | ✓ | Cons | ✗ |
|------|---|------|---|

**When should self-management be introduced?**

**Hospital**

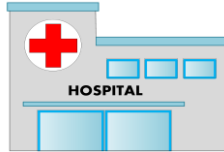

Pros

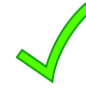

Cons

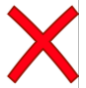

**Home**

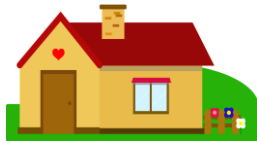

Pros

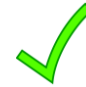

Cons

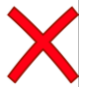

**Review appointments**

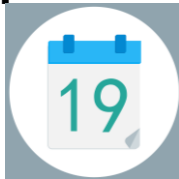

Pros

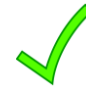

Cons

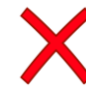

**Other:** \_\_\_\_\_

Pros

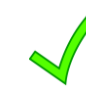

Cons

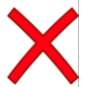

Supplement: pone.0259103.s001.pdf [file pone.0259103.s001.pdf]
