# Supplementary material for: Development of a self-management intervention for stroke survivors with aphasia using co-production and behaviour change theory: An outline of methods and processes
Source: PubMed Central journal article supplement (PMC8610248; doi:10.1371/journal.pone.0259103), 2021-11-23
Supplement: pone.0259103.s002.pdf [file pone.0259103.s002.pdf]

# Self-management

## What is self-management?

Living with **stroke** and **aphasia** can be **challenging**

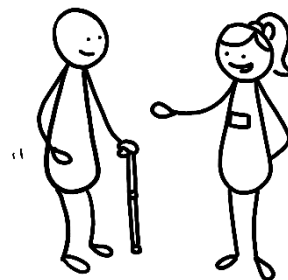

**Self-management** is not being **left** to do things on your **own**

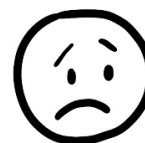

**But** finding ways **around** the **challenges** with the **support** of other **people**

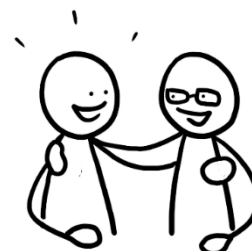

**So** that **stroke survivors** feel able to **cope**

and **do** the **things** they **enjoy**

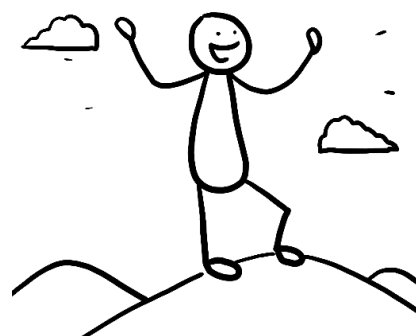

**Some** people say this is **finding** a '**new normal**'

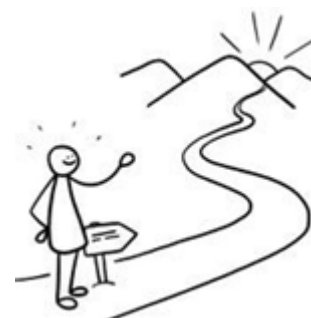

## Why is self-management important?

To increase **confidence**

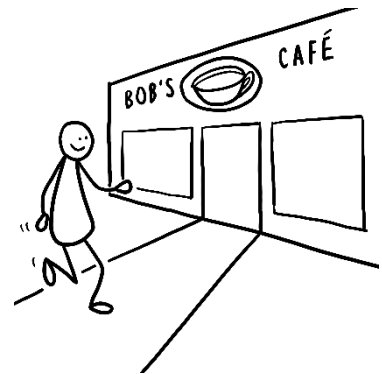

To help stroke survivors feel **in control** of their **lives**

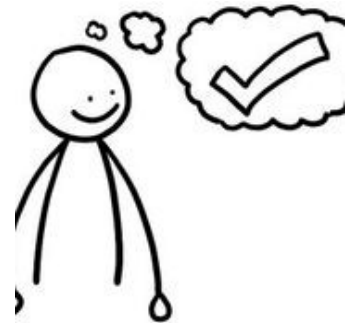

To **feel a sense of well-being**

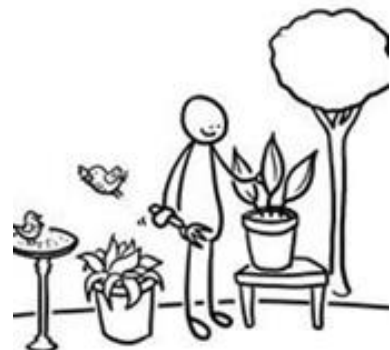

Sources: 1. [https://twitter.com/clark\\_ev/status/826028658141888512?s=03](https://twitter.com/clark_ev/status/826028658141888512?s=03)

2. <https://selfhelp4stroke.org/>

Images: © University of Leeds and Bradford Teaching Hospitals NHS Foundation Trust
