# Supplementary material for: Development of a self-management intervention for stroke survivors with aphasia using co-production and behaviour change theory: An outline of methods and processes
Source: PubMed Central journal article supplement (PMC8610248; doi:10.1371/journal.pone.0259103), 2021-11-23

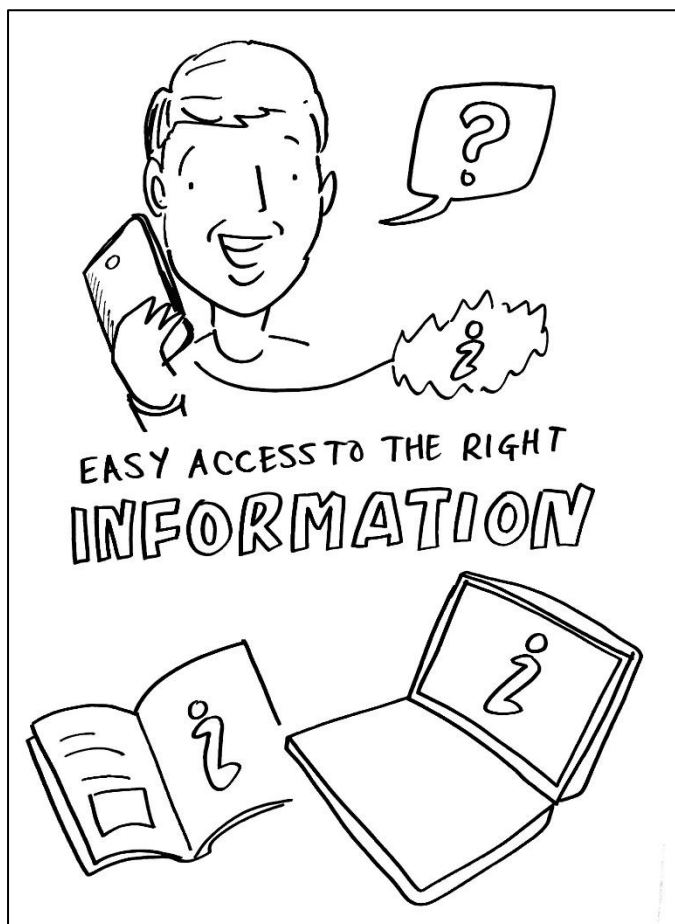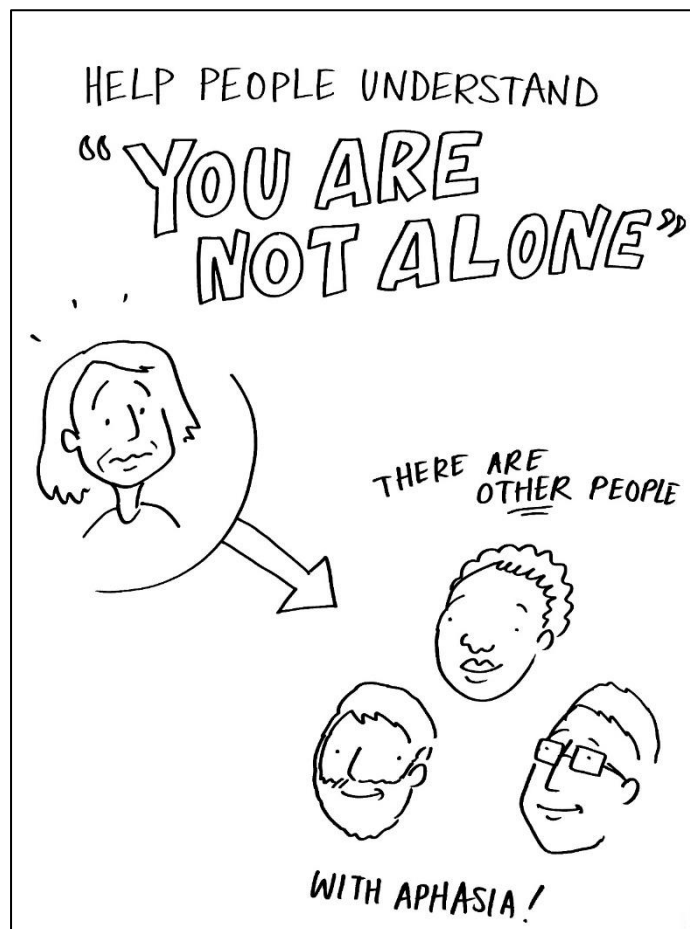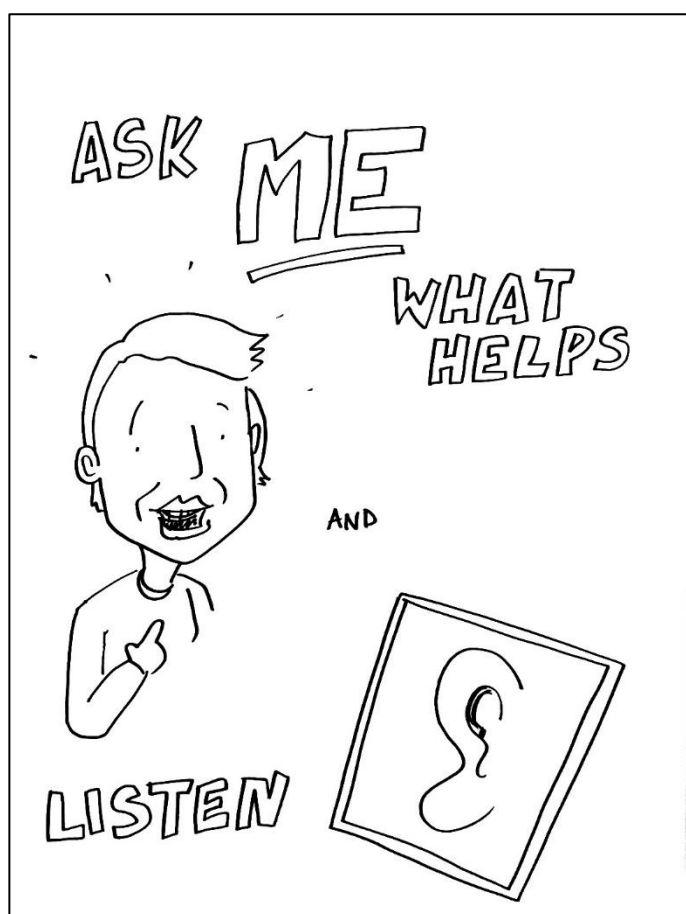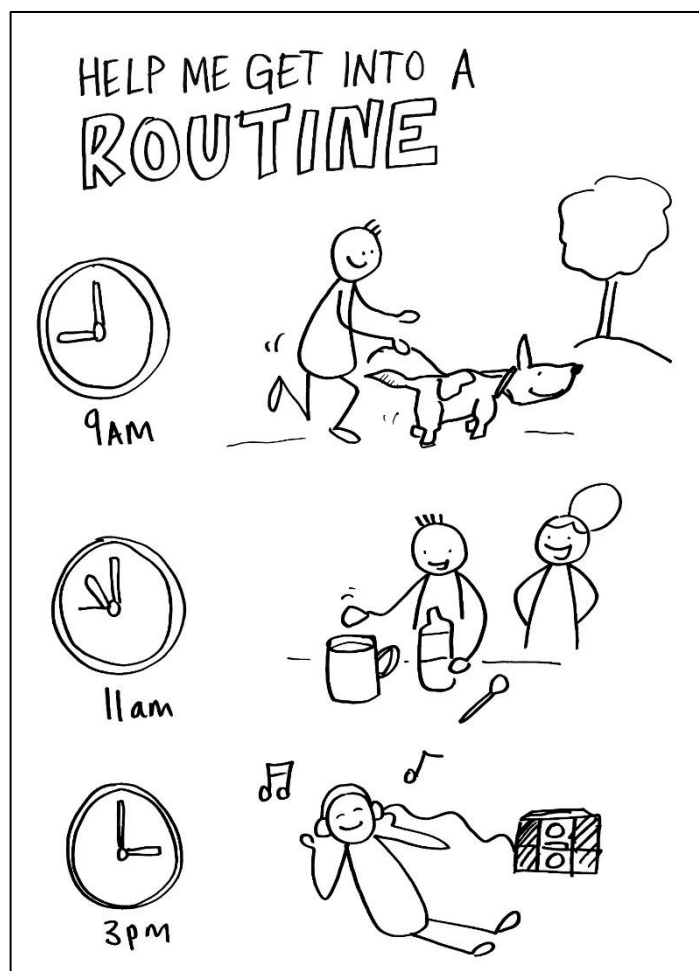

Supplement: pone.0259103.s003.pdf [file pone.0259103.s003.pdf]
